# Supplementary material for: Actions, indicators, and outputs in urban biodiversity plans: A multinational analysis of city practice
Source: PLoS One. 2020 Jul 8;15(7):e0235773. doi: 10.1371/journal.pone.0235773 (PMC7343153; doi:10.1371/journal.pone.0235773)
Supplement: S1 Table — (XLSX) [file pone.0235773.s002.xlsx]

## Sheet: biodiversity plans
City	Country	World Bank region	Plan publication date	Plan title
Shanghai	China	East Asia and Pacific	2013	上海市生物多样性保护战略与行动计划 2012 - 2030 (Shanghai City Biodiversity Protection Strategy and Action Plan)
Hong Kong	China	East Asia and Pacific	2016	Biodiversity Strategy and Action Plan 2016 - 2021
Singapore	Singapore	East Asia and Pacific	2009; updated 20 May 2019	Conserving Our Biodiversity: Singapore’s National Biodiversity Strategy and Action Plan
Sydney	Australia	East Asia and Pacific	2014	Urban Ecology Strategic Action Plan
Melbourne	Australia	East Asia and Pacific	2017	Nature in the City Strategy: Thriving Biodiversity and Healthy Ecosystems
Yokohama	Japan	East Asia and Pacific	2015	生物多様性横浜行動計画 (Biodiversity Yokohama Action Plan)
Nagoya	Japan	East Asia and Pacific	2010	生物多様性2050なごや戦略とは (Biodiversity 2050 Strategy)
Sapporo	Japan	East Asia and Pacific	2013	生物多様性さっぽろビジョン (Biodiversity Sapporo Vision)
Auckland Council	New Zealand	East Asia and Pacific	2012	Auckland Council's Indigenous Biodiversity Strategy
Christchurch	New Zealand	East Asia and Pacific	2008	Christchurch City Council Biodiversity Strategy 2008-2035
London	England	Europe and Central Asia	2016	City of London Biodiversity Action Plan 2016-2020
Berlin	Germany	Europe and Central Asia	2012	Berliner Strategie zur Biologischen Vielfalt (Berlin's Biodiversity Strategy)
Paris	France	Europe and Central Asia	2019	Plan Biodiversité de Paris 2018-2024 (Paris Biodiversity Plan)
Hamburg	Germany	Europe and Central Asia	2012	Grüne Vielfalt – Qualität der Stadt: Strategie für die Entwicklung der Biodiversität (Green diversity - quality of the city: Strategy for the development of biodiversity)
Barcelona	Spain	Europe and Central Asia	2013	Barcelona Green Infrastructure and Biodiversity Plan 2020
Birmingham	England	Europe and Central Asia	2013	Green Living Spaces Plan
Amsterdam	Netherlands	Europe and Central Asia	2012	Ecologische Visie (Ecological Vision) (Appendix 3)
Leeds	England	Europe and Central Asia	2000	Biodiversity Action Plan for Leeds
Oslo	Norway	Europe and Central Asia	2015	Improved Management of biodiversity in Oslo
Copenhagen	Denmark	Europe and Central Asia	2015	Urban Nature in Copenhagen Strategy 2015-2025
Glasgow	Scotland	Europe and Central Asia	2016	Glasgow Local Biodiversity Action Plan 2017-2027
Lisbon	Portugal	Europe and Central Asia	2012	Biodiversity in the city of Lisbon: A plan for 2020
Dublin	Ireland	Europe and Central Asia	2015	Dublin City Biodiversity Action Plan 2015-2020
Edinburgh	Scotland	Europe and Central Asia	2016	Edinburgh Biodiversity Action Plan 2016-2018
Zürich	Switzerland	Europe and Central Asia	2014	Konzept Arten- und Lebensraumförderung (Plan for Species and Habitat Promotion)
São Paulo	Brazil	Latin America and the Caribbean	2011	Local Biodiversity Strategies and Actions Plan of São Paulo City
Mexico City	Mexico	Latin America and the Caribbean	2013	Estrategia y Plan de Acción para la Biodiversidad de la Ciudad de México (Biodiversity Strategy and Action Plan for Mexico City) 2013-2023
Bogotá	Colombia	Latin America and the Caribbean	2010	Política para la Gestión de la Conservación de la Biodiversidad en el Distrito Capital (Policy for the Management of Biodiversity Conservation in the Capital District)
Medellín	Colombia	Latin America and the Caribbean	2014	La Propuesta para la Gestión Integral de la Biodiversidad y los Servicios Ecosistémicos en Medellín (Proposal for the integral management of biodiversity and ecosystem services in Medellín). Synthesis of the technical support document.
Jerusalem	Israel	Middle East and North Africa	2013	Local Biodiversity Strategy and Action Plan, English Abstract
Chicago, IL	USA	North America	2011	Chicago Nature & Wildlife Plan Update: A Strategy to Enhance Urban Ecosystems 2011-2016
Ville de Montréal	Canada	North America	2016	Sustainable Montréal 2016-2020
San Diego, CA	USA	North America	2008	Conservation Element (section within City of San Diego General Plan)
City of Calgary	Canada	North America	2015	Our Biodivercity: Calgary’s 10-year Biodiversity Strategic Plan
Toronto	Canada	North America	2019	Wild, Connected and Diverse: A Biodiversity Strategy for Toronto
Ethekwini (Durban)	South Africa	Sub-Saharan Africa	2008	Environmental Management Department Strategic Plan 2008-2013
Lilongwe	Malawi	Sub-Saharan Africa	2015	City of Lilongwe Integrated Biodiversity Strategy and Action Plan, strategic plan 2015-2020
Johannesburg	South Africa	Sub-Saharan Africa	2009	City of Joburg Biodiversity Strategy and Action Plan 2015
Cape Town	South Africa	Sub-Saharan Africa	2016	City of Cape Town Local Biodiversity Strategy and Action Plan 2016-2026
